# Supplementary material for: Antiinflammatory and Anticancer Properties of Grewia asiatica Crude Extracts and Fractions: A Bioassay‐Guided Approach
Source: Hindawi journal article supplement (doi:10.1155/2022/2277417), 2022-01-01

## Supplementary figure 2 (a – e): ESI-MS/MS analysis of GAMF3

T: ITMS - p ESI Full ms2 255.00@cid29.00 [70.00-500.00]

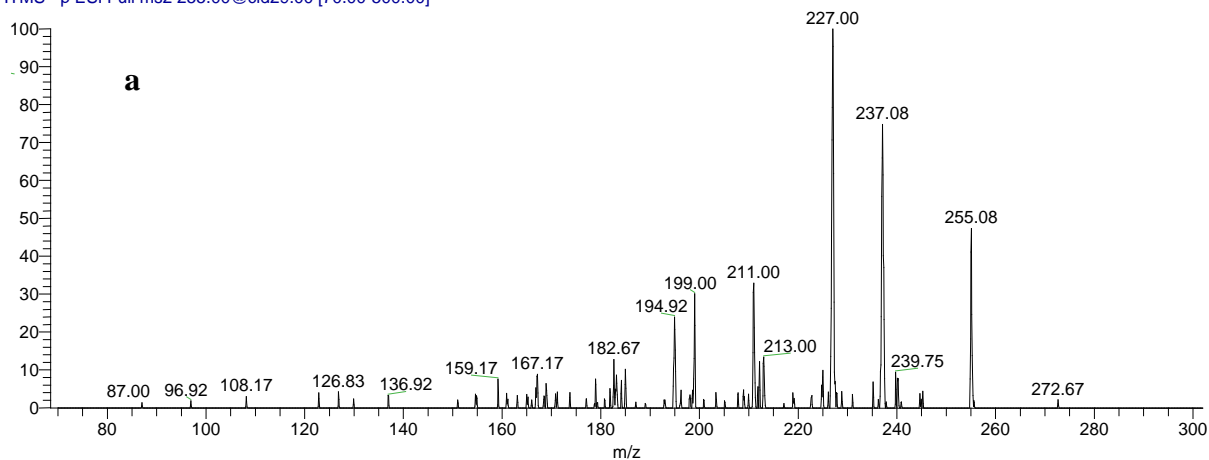

T: ITMS - p ESI Full ms2 265.00@cid24.00 [70.00-500.00]

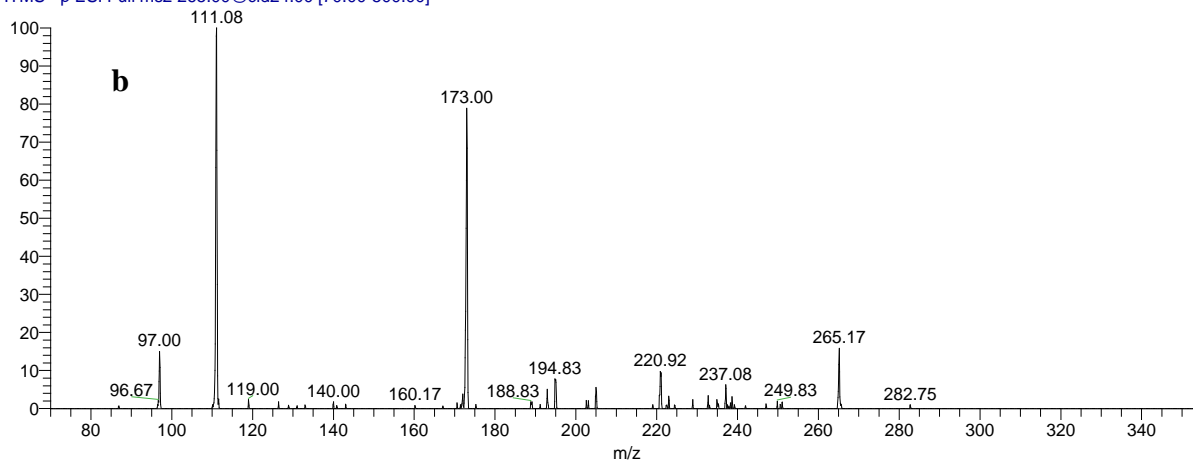

T: ITMS - p ESI Full ms2 301.00@cid20.00 [80.00-500.00]

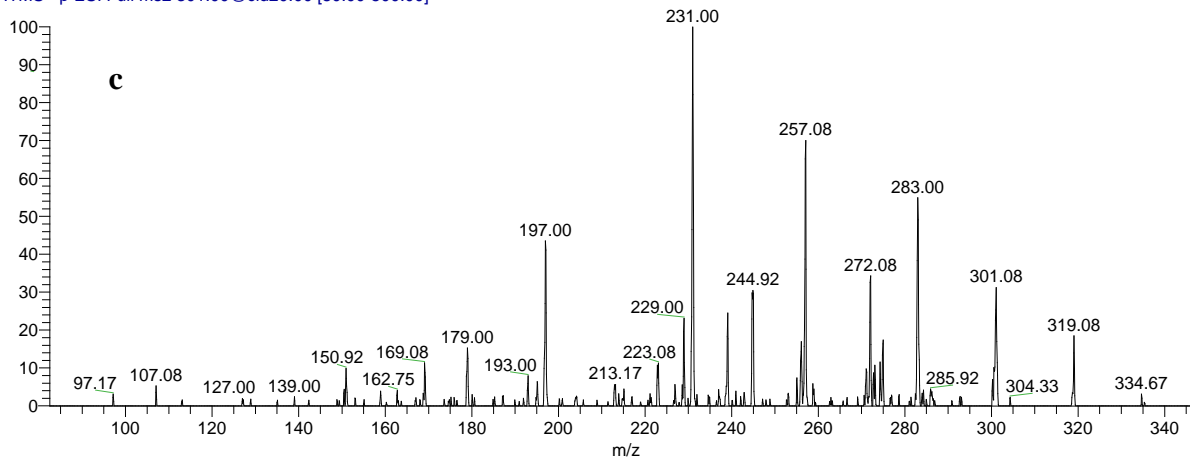

T: ITMS - p ESI Full ms2 317.00@cid21.00 [85.00-500.00]

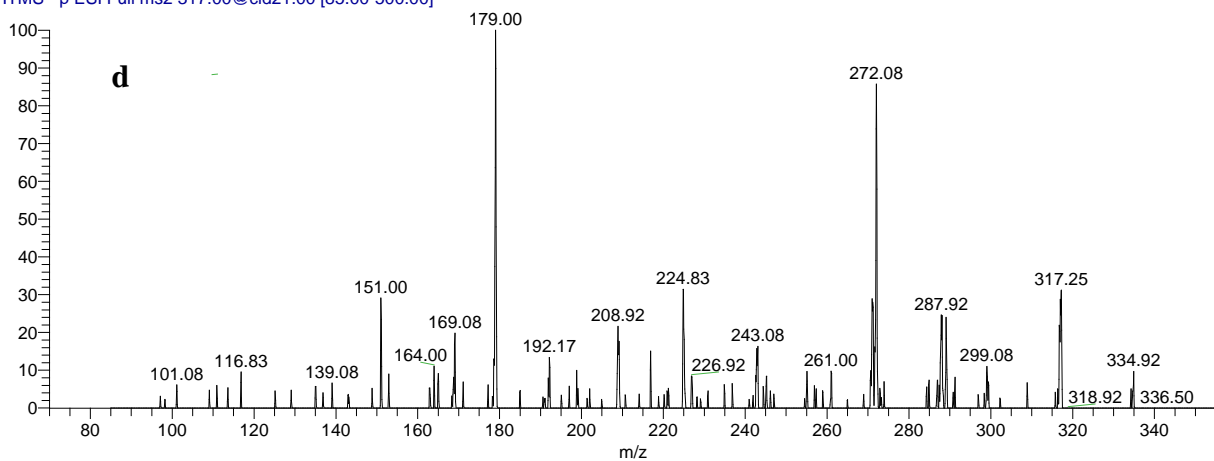

T: ITMS + p ESI Full ms2 324.00@cid20.00 [85.00-500.00]

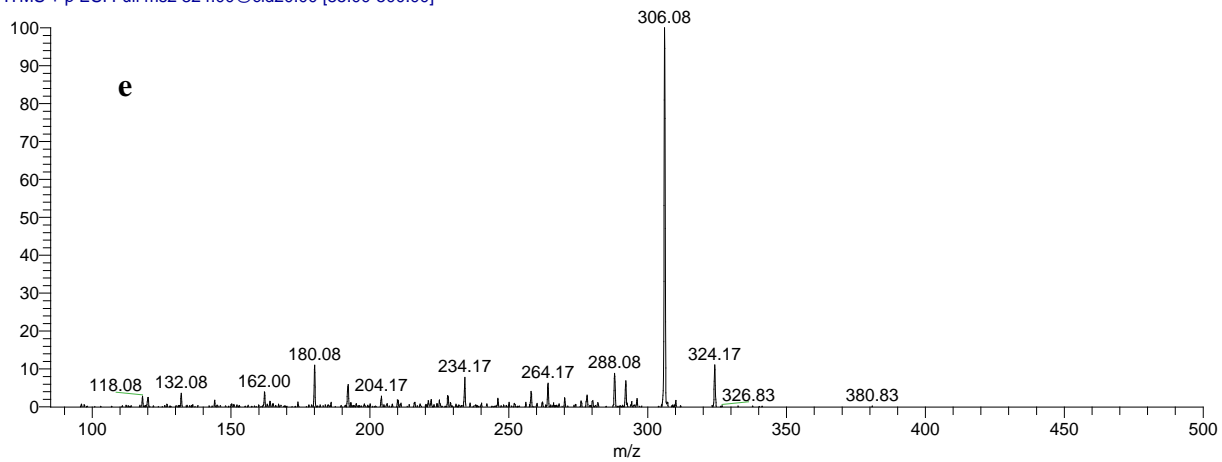

Supplement: f1 [file 2277417.f1.zip]
