# Supplementary material for: Antiinflammatory and Anticancer Properties of Grewia asiatica Crude Extracts and Fractions: A Bioassay‐Guided Approach
Source: Hindawi journal article supplement (doi:10.1155/2022/2277417), 2022-01-01

## Supplementary figure 1 (a – h): ESI-MS/MS analysis of GAHAF5

T: ITMS + p ESI Full ms2 175.00@cid33.00 [50.00-500.00]

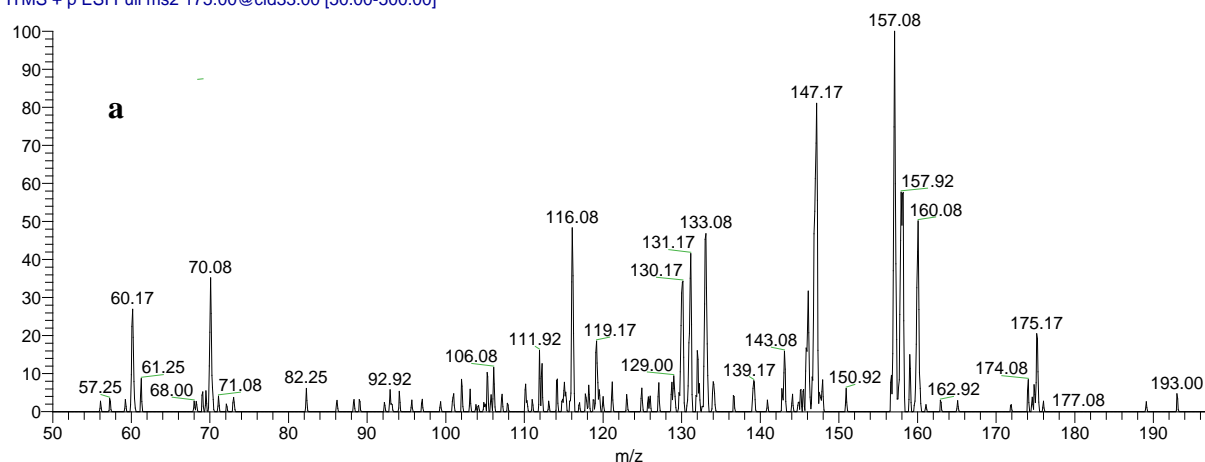

T: ITMS + p ESI Full ms2 179.00@cid30.00 [50.00-500.00]

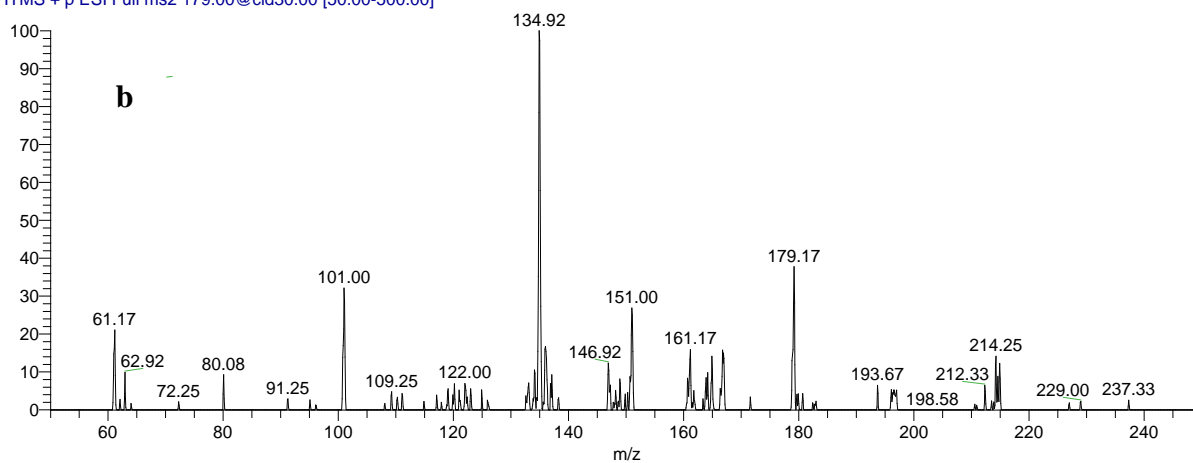

T: ITMS + p ESI Full ms2 195.00@cid30.00 [50.00-500.00]

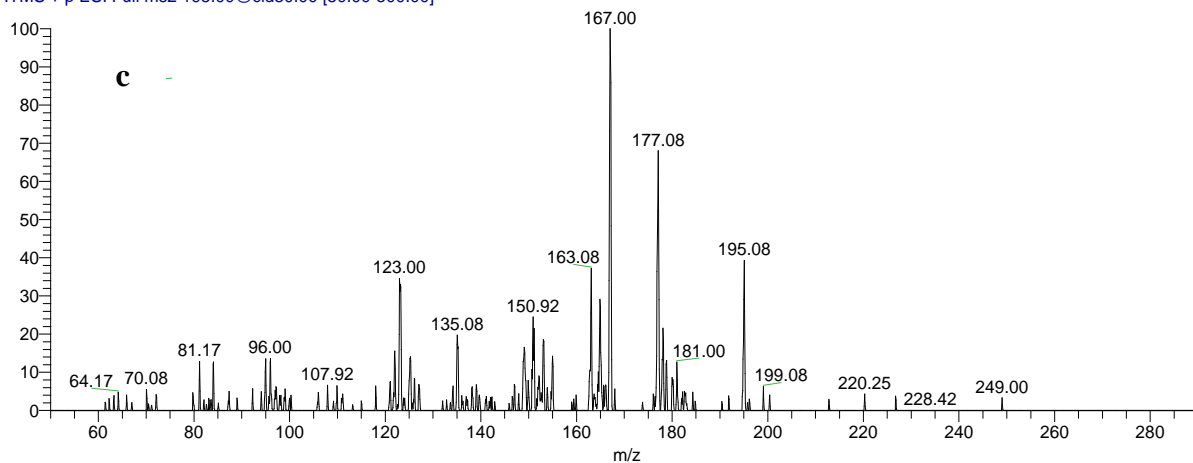

T: ITMS - p ESI Full ms2 290.00@cid20.00 [75.00-500.00]

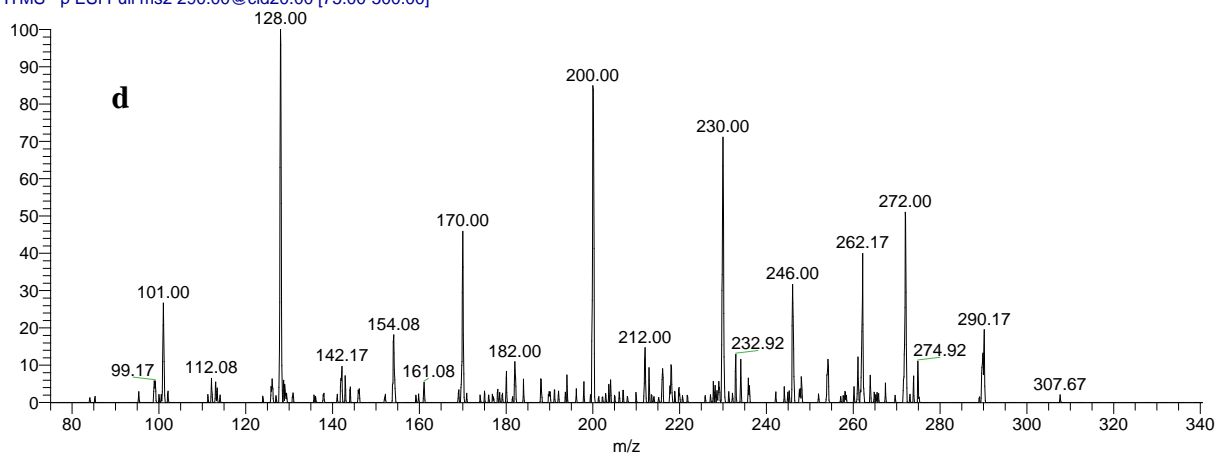

T: ITMS - p ESI Full ms2 301.00@cid34.00 [80.00-500.00]

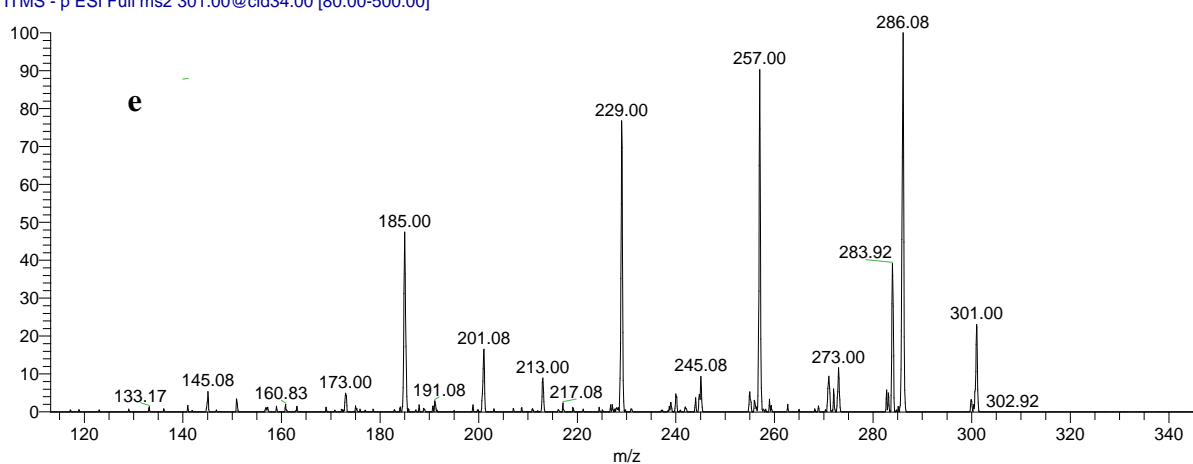

T: ITMS - p ESI Full ms2 311.00@cid34.00 [85.00-500.00]

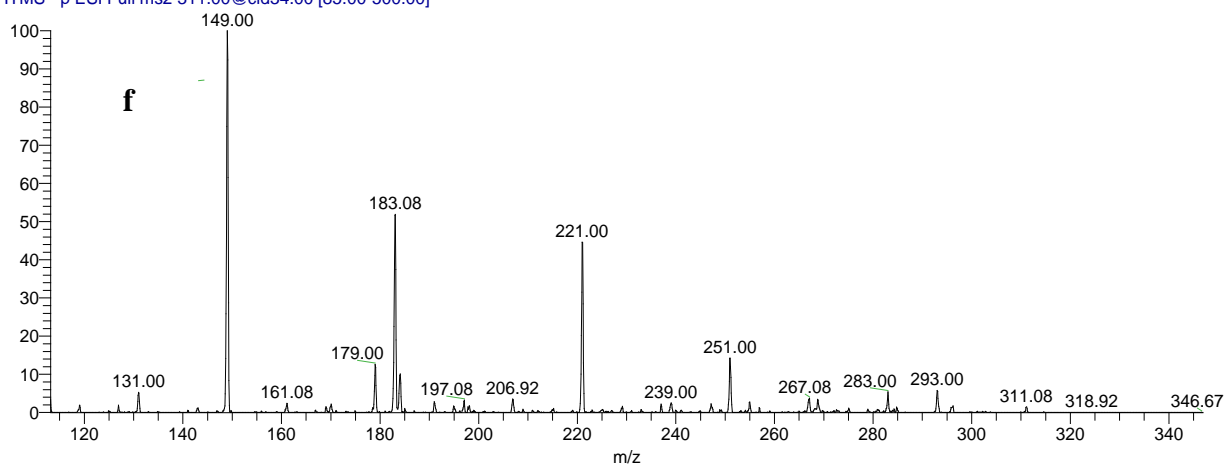

T: ITMS + p ESI Full ms2 353.00@cid20.00 [95.00-500.00]

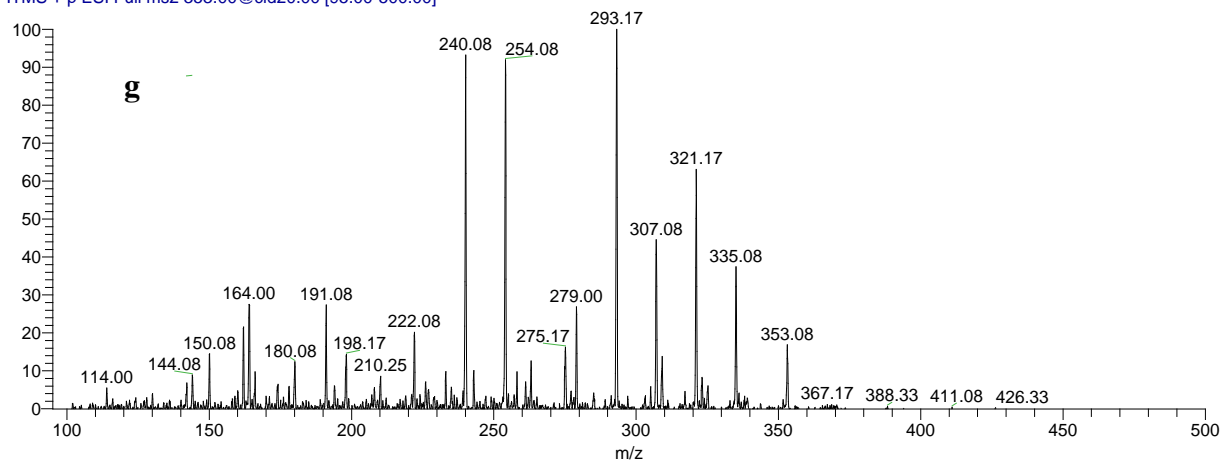

T: ITMS + p ESI Full ms2 363.00@cid20.00 [95.00-500.00]

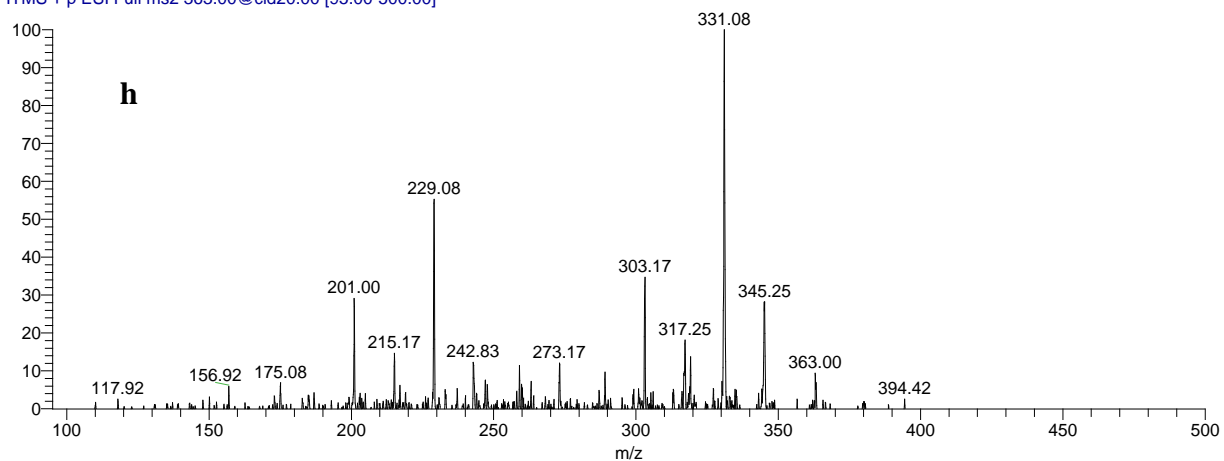

Supplement: f1 [file 2277417.f1.zip]
