# Supplementary material for: Antiinflammatory and Anticancer Properties of Grewia asiatica Crude Extracts and Fractions: A Bioassay-Guided Approach
Source: Biomed Res Int. 2022 Mar 28;2022:2277417. doi: 10.1155/2022/2277417 (PMC8979695; doi:10.1155/2022/2277417)
Supplement: Supplementary Materials — Supplementary Figures 1 and 2: raw data of ES-MS/MS analysis of GAHAF5 and GAMF3 fractions showing spectras of known and unknown compounds. Supplementary Table 1: qualitative screening of G. asiatica fruit extracts showing presence of secondary plant metabolites. [file 2277417.f1.zip]

Archive with 3 entries (3 files):
- Supplementary figure 1.pdf
- Supplementary figure 2.pdf
- Supplementary Table.docx
